# Supplementary material
Source: MDPI journal article supplement (https://www.mdpi.com/1999-4907/13/6/842)
Supplement: s1 [file s1]

## Supplementary Materials

**Table S1.** Annual mean  $\pm$  standard error (SE) and mixed effect model results for environment variables during manual flux measurements during pre-DC (2018/19) and post-DC periods (2020/21), classified by ditch treatment effects (Control versus DC) and distance to ditches combinations (4m, 20m and 40m). Fixed factors of mixed effect models include clean treatment (T), distance to ditches (D) and their interaction (TD). Column N refers to the sample size of each model. Significant p \*values ( $\alpha = 0.05$ ) are represented in bold face.

|                                                       |         | N   | Mean $\pm$ SE   |                     |                 |                      |                 |                 |                 |                 | p values from the mixed effect models |                  |
|-------------------------------------------------------|---------|-----|-----------------|---------------------|-----------------|----------------------|-----------------|-----------------|-----------------|-----------------|---------------------------------------|------------------|
|                                                       |         |     | 4m              | Control area<br>20m | 40m             | all Control<br>plots | 4m              | DC area<br>20m  | 40m             | all DC plots    | T                                     | D                |
| Ta<br>(°C)                                            | Pre DC  | 382 | 18.2 $\pm$ 1.0  | 18.4 $\pm$ 1.0      | 18.2 $\pm$ 1.0  | 18.3 $\pm$ 0.6       | 18.6 $\pm$ 1.0  | 18.1 $\pm$ 1.0  | 17.8 $\pm$ 1.0  | 18.2 $\pm$ 0.6  | 0.69                                  | 0.19             |
|                                                       | Post DC | 574 | 12.5 $\pm$ 0.2  | 12.7 $\pm$ 0.3      | 12.9 $\pm$ 0.4  | 12.7 $\pm$ 0.2       | 14.1 $\pm$ 0.5  | 13.9 $\pm$ 0.5  | 13.6 $\pm$ 0.4  | 13.8 $\pm$ 0.3  | <b>&lt; 0.01</b>                      | 0.27             |
| T <sub>s5</sub><br>(°C)                               | Pre DC  | 376 | 12.0 $\pm$ 0.6  | 12.2 $\pm$ 0.7      | 12.2 $\pm$ 0.6  | 12.1 $\pm$ 0.4       | 12.4 $\pm$ 0.6  | 12.7 $\pm$ 0.6  | 12.6 $\pm$ 0.6  | 12.6 $\pm$ 0.4  | 0.20                                  | 0.48             |
|                                                       | Post DC | 574 | 12.0 $\pm$ 0.4  | 12.4 $\pm$ 0.4      | 12.9 $\pm$ 0.5  | 12.4 $\pm$ 0.3       | 12.6 $\pm$ 0.5  | 13.1 $\pm$ 0.5  | 12.6 $\pm$ 0.5  | 12.8 $\pm$ 0.3  | <b>0.03</b>                           | <b>&lt; 0.01</b> |
| T <sub>s10</sub><br>(°C)                              | Pre DC  | 376 | 10.8 $\pm$ 0.5  | 11.1 $\pm$ 0.5      | 11.3 $\pm$ 0.5  | 11.0 $\pm$ 0.3       | 11.0 $\pm$ 0.4  | 11.3 $\pm$ 0.5  | 11.3 $\pm$ 0.5  | 11.2 $\pm$ 0.3  | 0.22                                  | <b>&lt; 0.01</b> |
|                                                       | Post DC | 574 | 11.0 $\pm$ 0.4  | 11.3 $\pm$ 0.4      | 11.7 $\pm$ 0.4  | 11.3 $\pm$ 0.2       | 11.2 $\pm$ 0.4  | 11.6 $\pm$ 0.4  | 11.4 $\pm$ 0.4  | 11.4 $\pm$ 0.2  | 0.37                                  | <b>&lt; 0.01</b> |
| PAR<br>( $\mu\text{mol m}^{-2} \text{s}^{-1}$ )       | Pre DC  | 373 | 762 $\pm$ 64    | 830 $\pm$ 62        | 786 $\pm$ 58    | 793 $\pm$ 35         | 805 $\pm$ 58    | 810 $\pm$ 62    | 703 $\pm$ 57    | 773 $\pm$ 34    | 0.06                                  | 0.13             |
|                                                       | Post DC | 573 | 643 $\pm$ 48    | 674 $\pm$ 48        | 683 $\pm$ 48    | 666 $\pm$ 28         | 710 $\pm$ 45    | 729 $\pm$ 46    | 702 $\pm$ 45    | 714 $\pm$ 26    | <b>0.02</b>                           | 0.59             |
| WTL<br>(cm)                                           | Pre DC  | 382 | -25 $\pm$ 1     | -29 $\pm$ 2         | -40 $\pm$ 2     | -31 $\pm$ 1          | -48 $\pm$ 2     | -40 $\pm$ 2     | -18 $\pm$ 1     | -36 $\pm$ 1     | 0.22                                  | 0.13             |
|                                                       | Post DC | 543 | -14 $\pm$ 1     | -16 $\pm$ 1         | -23 $\pm$ 1     | -17 $\pm$ 1          | -49 $\pm$ 1     | -35 $\pm$ 2     | -18 $\pm$ 1     | -34 $\pm$ 1     | <b>&lt; 0.01</b>                      | <b>&lt; 0.01</b> |
| SM ( $\text{m}^3 \text{m}^{-3}$ )                     | Pre DC  | 324 | 0.35 $\pm$ 0.02 | 0.37 $\pm$ 0.02     | 0.29 $\pm$ 0.02 | 0.34 $\pm$ 0.01      | 0.28 $\pm$ 0.01 | 0.30 $\pm$ 0.01 | 0.32 $\pm$ 0.02 | 0.30 $\pm$ 0.01 | <b>&lt; 0.01</b>                      | 0.32             |
|                                                       | Post DC | 458 | 0.49 $\pm$ 0.02 | 0.48 $\pm$ 0.02     | 0.34 $\pm$ 0.01 | 0.44 $\pm$ 0.01      | 0.26 $\pm$ 0.01 | 0.27 $\pm$ 0.01 | 0.31 $\pm$ 0.02 | 0.28 $\pm$ 0.01 | <b>&lt; 0.01</b>                      | <b>&lt; 0.01</b> |
| Peak in-frame green<br>areal coverage <sup>#</sup>    | Pre DC  | 24  | 0.34 $\pm$ 0.07 | 0.25 $\pm$ 0.08     | 0.05 $\pm$ 0.02 | 0.21 $\pm$ 0.05      | 0.20 $\pm$ 0.01 | 0.20 $\pm$ 0.07 | 0.22 $\pm$ 0.12 | 0.21 $\pm$ 0.05 | 0.89                                  | 0.49             |
|                                                       | Post DC | 24  | 0.56 $\pm$ 0.05 | 0.61 $\pm$ 0.10     | 0.35 $\pm$ 0.13 | 0.51 $\pm$ 0.06      | 0.46 $\pm$ 0.17 | 0.65 $\pm$ 0.12 | 0.59 $\pm$ 0.14 | 0.57 $\pm$ 0.08 | 0.98                                  | 0.35             |
| Peak surrounding green<br>areal coverage <sup>#</sup> | Pre DC  | 24  | 0.31 $\pm$ 0.02 | 0.24 $\pm$ 0.04     | 0.16 $\pm$ 0.01 | 0.24 $\pm$ 0.02      | 0.13 $\pm$ 0.01 | 0.17 $\pm$ 0.05 | 0.19 $\pm$ 0.06 | 0.16 $\pm$ 0.02 | <b>0.04</b>                           | 0.50             |
|                                                       | Post DC | 24  | 0.69 $\pm$ 0.02 | 0.62 $\pm$ 0.04     | 0.57 $\pm$ 0.04 | 0.62 $\pm$ 0.02      | 0.51 $\pm$ 0.02 | 0.57 $\pm$ 0.07 | 0.49 $\pm$ 0.08 | 0.52 $\pm$ 0.03 | <b>&lt; 0.01</b>                      | 0.29             |
| Peak in-frame<br>greenness index <sup>#</sup>         | Pre DC  | 24  | 0.35 $\pm$ 0.05 | 0.23 $\pm$ 0.01     | 0.17 $\pm$ 0.01 | 0.25 $\pm$ 0.03      | 0.23 $\pm$ 0.07 | 0.23 $\pm$ 0.03 | 0.28 $\pm$ 0.10 | 0.25 $\pm$ 0.04 | 0.89                                  | 0.49             |
|                                                       | Post DC | 24  | 0.60 $\pm$ 0.02 | 0.59 $\pm$ 0.06     | 0.40 $\pm$ 0.10 | 0.53 $\pm$ 0.04      | 0.44 $\pm$ 0.12 | 0.62 $\pm$ 0.08 | 0.53 $\pm$ 0.12 | 0.53 $\pm$ 0.06 | 0.56                                  | 0.41             |
| Peak surrounding<br>greenness index <sup>#</sup>      | Pre DC  | 24  | 0.28 $\pm$ 0.02 | 0.24 $\pm$ 0.03     | 0.19 $\pm$ 0.01 | 0.24 $\pm$ 0.01      | 0.19 $\pm$ 0.02 | 0.21 $\pm$ 0.02 | 0.20 $\pm$ 0.01 | 0.20 $\pm$ 0.01 | <b>0.03</b>                           | 0.09             |
|                                                       | Post DC | 24  | 0.53 $\pm$ 0.03 | 0.47 $\pm$ 0.02     | 0.44 $\pm$ 0.02 | 0.48 $\pm$ 0.02      | 0.37 $\pm$ 0.02 | 0.40 $\pm$ 0.05 | 0.38 $\pm$ 0.04 | 0.39 $\pm$ 0.02 | <b>&lt; 0.01</b>                      | 0.23             |
| Top soil (10cm) C concentration (%)                   |         | 24  | 34 $\pm$ 10     | 14 $\pm$ 4          | 21 $\pm$ 7      | 23 $\pm$ 5           | 32 $\pm$ 11     | 25 $\pm$ 13     | 24 $\pm$ 10     | 27 $\pm$ 6      | 0.60                                  | 0.32             |
| Top soil (10cm) N concentration (%)                   |         | 24  | 1.21 $\pm$ 0.35 | 0.39 $\pm$ 0.10     | 0.71 $\pm$ 0.25 | 0.77 $\pm$ 0.17      | 1.16 $\pm$ 0.39 | 0.79 $\pm$ 0.42 | 0.78 $\pm$ 0.38 | 0.91 $\pm$ 0.21 | 0.61                                  | 0.18             |
| Top soil (10cm) C:N ratio                             |         | 24  | 27 $\pm$ 1      | 33 $\pm$ 3          | 31 $\pm$ 2      | 30 $\pm$ 1           | 28 $\pm$ 1      | 31 $\pm$ 1      | 35 $\pm$ 5      | 31 $\pm$ 2      | 0.70                                  | 0.08             |

\*values ( $\alpha = 0.05$ ) are represented in bold face.

**Table S2.** Model estimates for the total annual carbon dioxide (CO<sub>2</sub>) and methane (CH<sub>4</sub>) balances in control and ditch cleaning (DC) treatment areas. CO<sub>2</sub> fluxes includes its net exchange (NEE) and component fluxes of gross primary productivity (GPP) and ecosystem respiration (R<sub>eco</sub>). Columns denotes the three distances (4m, 20m and 40m) from ditches estimated for the four study years (2018 to 2021). Values are in the unit of t-C ha<sup>-1</sup> year<sup>-1</sup> for CO<sub>2</sub> and of kg-C ha<sup>-1</sup> year<sup>-1</sup> for CH<sub>4</sub>. Numbers are represented with ± standard error (SE).

| Flux                                                                  | Treatment | 4m from ditch |          |           |           | 20m from ditch |          |           |           | 40m from ditch |          |          |           | Total    |          |           |           |
|-----------------------------------------------------------------------|-----------|---------------|----------|-----------|-----------|----------------|----------|-----------|-----------|----------------|----------|----------|-----------|----------|----------|-----------|-----------|
|                                                                       |           | Pre-DC        |          | Post-DC   |           | Pre-DC         |          | Post-DC   |           | Pre-DC         |          | Post-DC  |           | Pre-DC   |          | Post-DC   |           |
|                                                                       |           | 2018          | 2019     | 2020      | 2021      | 2018           | 2019     | 2020      | 2021      | 2018           | 2019     | 2020     | 2021      | 2018     | 2019     | 2020      | 2021      |
| CO <sub>2</sub> (t-C ha <sup>-1</sup> year <sup>-1</sup> )            |           |               |          |           |           |                |          |           |           |                |          |          |           |          |          |           |           |
| NEE                                                                   | Control   | 6.1±1.2       | 4.4±2.0  | 2.2±1.4   | 0.5±1.5   | 6.0±1.2        | 4.7±1.9  | 2.9±1.4   | 1.8±1.6   | 6.2±1.4        | 4.6±1.7  | 3.8±1.4  | 1.7±1.5   | 6.1±1.2  | 4.6±1.9  | 3.0±1.4   | 1.3±1.5   |
|                                                                       | DC        | 6.6±1.3       | 4.1±1.6  | 3.1±1.5   | 1.9±1.7   | 7.4±1.7        | 4.2±1.7  | 3.3±1.6   | 1.9±1.8   | 7.6±1.7        | 4.0±1.5  | 2.9±1.4  | 1.8±1.7   | 7.2±1.6  | 4.1±1.6  | 3.2±1.5   | 1.8±1.8   |
| GPP                                                                   | Control   | -             | -4.8±0.7 | -10.0±0.5 | -11.7±0.7 | -              | -4.3±0.6 | -9.4±0.5  | -11.6±0.7 | -              | -3.6±0.5 | -9.0±0.5 | -11.2±0.6 | -        | -4.2±0.6 | -9.5±0.5  | -11.7±0.7 |
|                                                                       | DC        | -             | -3.8±0.6 | -10.0±0.9 | -12.4±1.1 | -              | -4.1±0.6 | -10.5±0.9 | -12.9±1.2 | -              | -3.8±0.6 | -9.4±0.5 | -12.4±1.1 | -        | -3.9±1.0 | -10.3±0.9 | -12.6±1.2 |
| R <sub>eco</sub>                                                      | Control   | 6.1±1.2       | 9.2±1.8  | 12.1±1.3  | 12.9±1.3  | 6.0±1.2        | 9.0±1.8  | 12.3±1.3  | 13.4±1.5  | 6.2±1.4        | 8.2±1.6  | 12.8±1.4 | 12.8±1.4  | 6.1±1.2  | 8.8±1.7  | 12.4±1.3  | 13.1±1.4  |
|                                                                       | DC        | 6.6±1.3       | 7.9±1.5  | 13.2±1.2  | 14.2±1.3  | 7.4±1.7        | 8.3±1.5  | 13.8±1.3  | 14.4±1.3  | 7.6±1.7        | 7.9±1.4  | 12.3±1.3 | 14.2±1.3  | 7.2±1.6  | 8.0±1.5  | 13.4±1.3  | 14.4±1.4  |
| CH <sub>4</sub> (kg-C ha <sup>-1</sup> year <sup>-1</sup> )           |           |               |          |           |           |                |          |           |           |                |          |          |           |          |          |           |           |
|                                                                       | Control   | -1.8±1.0      | 0.9±1.0  | 131±31    | 176±66    | -1.4±1.1       | -1.1±4.8 | 1.7±63    | 27±68     | -4.1±1.4       | -2.3±1.3 | -1.3±1.0 | -1.8±1.5  | -2.2±0.7 | -0.6±1.6 | 1.7±25.5  | 27±39     |
|                                                                       | DC        | -3.2±0.5      | -3.5±1.0 | -3.1±0.8  | -4.3±1.3  | -2.3±0.5       | -2.4±0.6 | -2.0±1.4  | 0.2±3.3   | -2.7±1.7       | -2.4±9.8 | 1.3±14.8 | 1.4±30.1  | -3.0±0.6 | -3.0±3.3 | -2.3±5.1  | -2.7±10.2 |
| Total balance <sup>d</sup> (t-C ha <sup>-1</sup> year <sup>-1</sup> ) |           |               |          |           |           |                |          |           |           |                |          |          |           |          |          |           |           |
|                                                                       | Control   | 6.1±1.2       | 4.4±2.0  | 2.3±1.4   | 0.7±1.5   | 6.0±1.2        | 4.7±1.9  | 2.9±1.4   | 1.8±1.6   | 6.2±1.4        | 4.6±1.7  | 3.8±1.4  | 1.7±1.5   | 6.1±1.2  | 4.6±1.9  | 3.0±1.4   | 1.3±1.5   |
|                                                                       | DC        | 6.6±1.3       | 4.1±1.6  | 3.1±1.5   | 1.9±1.7   | 7.4±1.7        | 4.2±1.7  | 3.3±1.6   | 1.9±1.8   | 7.6±1.7        | 4.0±1.5  | 2.9±1.4  | 1.8±1.7   | 7.2±1.6  | 4.1±1.6  | 3.2±1.5   | 1.8±1.8   |

**Table S3.** The correlation coefficients (or loadings) of the each significant Principal components (PCs) with the input variables. Significant PCs are defined by the Kaiser criterion where the eigenvalues are greater than one. Five PCs were defined significant in the PCA with sample data for Pre-DC Period shown at the left columns, whereas four PCs were significant for the Post-DC period at the right columns. The total variance explained for each PC (in %) is presented at the first row.

| Variance explained    | PCs for Pre-DC Period |       |       |       |       | PCs for Post-DC period |       |       |       |
|-----------------------|-----------------------|-------|-------|-------|-------|------------------------|-------|-------|-------|
|                       | PC1                   | PC2   | PC3   | PC4   | PC5   | PC1                    | PC2   | PC3   | PC4   |
|                       | 38%                   | 15%   | 13%   | 9%    | 9%    | 33%                    | 22%   | 14%   | 11%   |
| Treatment variables   |                       |       |       |       |       |                        |       |       |       |
| Distance              | -0.40                 | 0.58  | 0.26  | -0.01 | -0.25 | -0.32                  | 0.11  | -0.52 | 0.61  |
| Clean                 | -0.12                 | -0.28 | 0.54  | 0.15  | 0.23  | -0.24                  | -0.58 | -0.19 | -0.41 |
| Flux variables        |                       |       |       |       |       |                        |       |       |       |
| NEE                   | -0.83                 | -0.12 | -0.23 | -0.10 | 0.22  | -0.81                  | 0.22  | 0.30  | 0.03  |
| Reco                  | 0.36                  | -0.68 | -0.12 | 0.36  | -0.07 | 0.23                   | -0.80 | -0.21 | -0.05 |
| GPP                   | -0.86                 | 0.31  | -0.11 | -0.30 | 0.22  | -0.72                  | 0.56  | 0.33  | 0.05  |
| CH <sub>4</sub>       | 0.60                  | 0.57  | 0.15  | 0.14  | 0.38  | 0.66                   | 0.29  | 0.35  | 0.14  |
| Environment variables |                       |       |       |       |       |                        |       |       |       |
| T <sub>s5</sub>       | -0.52                 | -0.10 | 0.61  | 0.42  | 0.34  | -0.68                  | -0.46 | 0.02  | 0.41  |
| T <sub>s10</sub>      | -0.61                 | 0.06  | 0.64  | 0.11  | 0.21  | -0.62                  | -0.40 | 0.15  | 0.57  |
| WTL                   | 0.43                  | 0.71  | 0.24  | 0.01  | -0.24 | 0.47                   | 0.64  | -0.09 | 0.53  |
| SM                    | 0.63                  | 0.52  | -0.21 | 0.00  | 0.38  | 0.70                   | 0.48  | 0.22  | 0.19  |
| g <sub>cc</sub>       | 0.86                  | -0.06 | 0.29  | 0.23  | -0.12 | 0.87                   | -0.25 | -0.22 | 0.08  |
| VC                    | 0.83                  | 0.05  | -0.04 | 0.36  | -0.01 | 0.78                   | -0.34 | -0.31 | 0.29  |
| N                     | 0.62                  | -0.26 | 0.41  | -0.59 | 0.10  | 0.25                   | -0.54 | 0.69  | 0.24  |
| C                     | 0.59                  | -0.27 | 0.45  | -0.59 | 0.01  | 0.24                   | -0.58 | 0.63  | 0.29  |
| CN                    | -0.42                 | 0.11  | 0.38  | 0.07  | -0.73 | -0.34                  | -0.06 | -0.55 | 0.32  |
